# Supplementary material for: Competition of Plants and Microorganisms for Added Nitrogen in Different Fertilizer Forms in a Semi-Arid Climate
Source: MDPI journal article supplement (doi:10.3390/agronomy11122472), 2021-12-04
Supplement: s1 [file s1]

# Competition of Plants and Microorganisms for Added Nitrogen in Different Fertilizer Forms in Semi-Arid Climate

Markus Koch<sup>1,2\*</sup>, Kanat Akshalov<sup>3</sup>, Jannis Florian Carstens<sup>1,4</sup>, Olga Shibistova<sup>1,5</sup>, Claus Florian Stange<sup>6</sup>, Simon Thiedau<sup>1</sup>, Alfiya Kassymova<sup>7</sup>, Leopold Sauheittl<sup>1</sup>, Tobias Meinel<sup>8</sup>, Georg Guggenberger<sup>1</sup>

<sup>1</sup> Institute of Soil Science, Leibniz University Hanover, Herrenhäuser Str. 2, 30419 Hanover, Germany

<sup>2</sup> Geoecology, Martin Luther University Halle-Wittenberg, von-Seckendorff-Platz 4, 06120 Halle, Germany

<sup>3</sup> Scientific and Production Center for Grain Farming named after A. I. Baraev, Shortandy, Kazakhstan

<sup>4</sup> Technische Universität Clausthal, Adolph-Roemer-Straße 2A, 38678 Clausthal-Zellerfeld

<sup>5</sup> VN Sukachev Institute of Forest, Siberian Branch of the Russian Academy of Sciences, Krasnoyarsk, 660036, Russian Federation

<sup>6</sup> Federal Institute for Geosciences and Natural Resources (BGR), Stilleweg 2, 30655 Hannover, Germany

<sup>7</sup> JSC Atameken-Agro, Eastern Industrial Zone Driveway 20, Building 30, 020000, Kokschetau, Republic of Kazakhstan.

<sup>8</sup> Amazonen-Werke H. Dryer GmbH & Co. KG, Am Amazonenwerk 9-13, 49205 Hasbergen, Germany

\* Correspondence: koch@ifbk.uni-hannover.de

## Supplementary Material

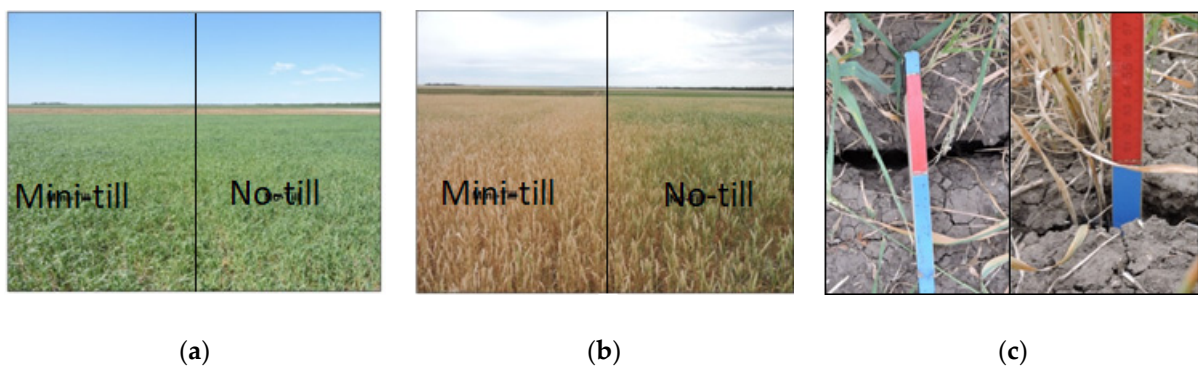

**Figure S1.** Field observations. Plant development in (a) July (day 43) and (b) August (day 77) for mini-till and no-till and (c) soil cracking in August (day 77)

**Table S1.** Gravimetric water contents in percent for each soil increment for each sampling time point. Given is the mean  $\pm$  the standard deviation of n = 9 microplots.

| Tillage   | Depth (cm) | May        | June       | July       | August     |
|-----------|------------|------------|------------|------------|------------|
| Mini-till | 0-20       | 26 $\pm$ 6 | 16 $\pm$ 6 | 15 $\pm$ 7 | 14 $\pm$ 2 |
|           | 20-40      | 23 $\pm$ 3 | 17 $\pm$ 7 | 17 $\pm$ 6 | 11 $\pm$ 2 |
|           | 40-60      | 22 $\pm$ 2 | 14 $\pm$ 7 | 15 $\pm$ 5 | 11 $\pm$ 1 |
| No-till   | 0-20       | 22 $\pm$ 5 | 17 $\pm$ 5 | 17 $\pm$ 5 | 13 $\pm$ 4 |
|           | 20-40      | 23 $\pm$ 4 | 16 $\pm$ 5 | 16 $\pm$ 6 | 11 $\pm$ 1 |
|           | 40-60      | 19 $\pm$ 3 | 14 $\pm$ 6 | 18 $\pm$ 6 | 11 $\pm$ 2 |

**Table S2.** Absolute  $^{15}\text{N}$  amount in mg per subplot in nitrate, MBN and the 4-20 cm soil depth increment 3 shortly before (May) and after (June) fertilization. Note that in the 4-20 cm soil depth increment  $^{15}\text{N}$  recovered in nitrate and MBN is not included.

| Time | Tillage form | Fertilizer form | $\text{NO}_3\text{-}^{15}\text{N}$ | $\text{MBN}^{15}\text{N}$ | 0-20 cm soil     |
|------|--------------|-----------------|------------------------------------|---------------------------|------------------|
| May  | Mini-till    | Liquid          | 0 $\pm$ 0                          | 0.0 $\pm$ 0.0             | 0 $\pm$ 0.0      |
|      | Mini-till    | Granular        | 0 $\pm$ 0                          | 0.0 $\pm$ 0.0             | 0.1 $\pm$ 0.2    |
|      | No-till      | Liquid          | 0 $\pm$ 0                          | 0.0 $\pm$ 0.01            | 0.0 $\pm$ 0.0    |
|      | No-till      | Granular        | 0 $\pm$ 0                          | 0.0 $\pm$ 0.0             | 0.1 $\pm$ 0.2    |
| June | Mini-till    | Liquid          | 22.6 $\pm$ 67.7                    | 5.8 $\pm$ 7.1             | 27.2 $\pm$ 80.6  |
|      | Mini-till    | Granular        | 5.5 $\pm$ 16.6                     | 5.5 $\pm$ 9.8             | 77.9 $\pm$ 177.9 |
|      | No-till      | Liquid          | 20.4 $\pm$ 35.4                    | 5.5 $\pm$ 6.9             | 78.0 $\pm$ 127.1 |
|      | No-till      | granular        | 41.9 $\pm$ 103.6                   | 12.4 $\pm$ 33.0           | 48.7 $\pm$ 82.3  |

**Table S3.** Results of 2-way-ANOVAs with post-hoc Tukey HSD test for the influence of fertilizer and tillage form and their interaction on various soil and plant parameters for the sampling times June, July, and August. Only significant interactions are shown. Input units of each parameter were: t ha<sup>-1</sup> for plant yield, kg ha<sup>-1</sup> for plant N uptake, mg kg<sup>-1</sup> for MBN and  $\text{NO}_3\text{-N}$ , g m<sup>-2</sup> for N contents in plant compartments, and % for all  $^{15}\text{N}$  recoveries.

| Aboveground dry weight August |      |         |          |         |         | A            |
|-------------------------------|------|---------|----------|---------|---------|--------------|
|                               | D.f. | Sum Sq. | Mean Sq. | F value | p value | significance |
| Fertilizer form               | 1    | 0.64    | 0.64     | 0.27    | 0.62    |              |
| Tillage form                  | 1    | 6.91    | 6.91     | 2.93    | 0.13    |              |
| Fertilizer:Tillage            | 1    | 0.54    | 0.54     | 0.23    | 0.65    |              |
| Residuals                     | 8    | 18.84   | 2.36     |         |         |              |
| Plant N uptake August         |      |         |          |         |         | B            |
|                               | D.f. | Sum Sq. | Mean Sq. | F value | p value | significance |
| Fertilizer form               | 1    | 1040    | 1040     | 1.56    | 0.25    |              |
| Tillage form                  | 1    | 384     | 384      | 0.58    | 0.47    |              |
| Fertilizer:Tillage            | 1    | 376     | 376      | 0.56    | 0.47    |              |
| Residuals                     | 8    | 5333    | 667      |         |         |              |
| Grain yield August            |      |         |          |         |         | C            |
|                               | D.f. | Sum Sq. | Mean Sq. | F value | p value | significance |
| Fertilizer form               | 1    | 0.31    | 0.306    | 0.5     | 0.5     |              |
| Tillage form                  | 1    | 1.89    | 1.887    | 3.07    | 0.12    |              |

|                    |   |      |       |      |      |
|--------------------|---|------|-------|------|------|
| Fertilizer:Tillage | 1 | 0.16 | 0.157 | 0.26 | 0.63 |
| Residuals          | 8 | 4.92 | 0.615 |      |      |

| MBN June           |      |         |          |         |         | D            |
|--------------------|------|---------|----------|---------|---------|--------------|
|                    | D.f. | Sum Sq. | Mean Sq. | F value | p value | significance |
| Fertilizer form    | 1    | 30      | 30       | 0.48    | 0.51    |              |
| Tillage form       | 1    | 22      | 22       | 0.36    | 0.57    |              |
| Fertilizer:Tillage | 1    | 73      | 73       | 1.19    | 0.31    |              |
| Residuals          | 8    | 494     | 61.8     |         |         |              |

| MBN July           |      |         |          |         |         | E            |
|--------------------|------|---------|----------|---------|---------|--------------|
|                    | D.f. | Sum Sq. | Mean Sq. | F value | p value | significance |
| Fertilizer form    | 1    | 129.8   | 129.8    | 7.15    | 0.028   | *            |
| Tillage form       | 1    | 57.8    | 57.8     | 3.19    | 0.112   |              |
| Fertilizer:Tillage | 1    | 18.1    | 18.1     | 1       | 0.347   |              |
| Residuals          | 8    | 145.1   | 18.1     |         |         |              |

Signif. codes: 0 '\*\*\*' 0.001 '\*\*' 0.01 '\*' 0.05 '.' 0.1 ' ' 1

| Comparison        | Difference | lwr    | upr   | p adj  |
|-------------------|------------|--------|-------|--------|
| Granular - Liquid | 6.577      | 0.9069 | 12.25 | 0.0282 |

| MBN August         |      |         |          |         |         | F            |
|--------------------|------|---------|----------|---------|---------|--------------|
|                    | D.f. | Sum Sq. | Mean Sq. | F value | p value | significance |
| Fertilizer form    | 1    | 36.4    | 36.4     | 1.58    | 0.244   |              |
| Tillage form       | 1    | 170.1   | 170.1    | 7.42    | 0.026   | *            |
| Fertilizer:Tillage | 1    | 24.1    | 24.1     | 1.05    | 0.336   |              |
| Residuals          | 8    | 183.5   | 22.9     |         |         |              |

Signif. codes: 0 '\*\*\*' 0.001 '\*\*' 0.01 '\*' 0.05 '.' 0.1 ' ' 1

| Comparison          | Difference | lwr    | upr    | p adj  |
|---------------------|------------|--------|--------|--------|
| No-till - Mini-till | -7.531     | -13.91 | -1.154 | 0.0261 |

| T <sup>15</sup> N recovery in 0-20 cm June |      |         |          |         |         | G            |
|--------------------------------------------|------|---------|----------|---------|---------|--------------|
|                                            | D.f. | Sum Sq. | Mean Sq. | F value | p value | significance |
| Fertilizer form                            | 1    | 96      | 96       | 0.28    | 0.61    |              |
| Tillage form                               | 1    | 378     | 378      | 1.09    | 0.33    |              |
| Fertilizer:Tillage                         | 1    | 53      | 53       | 0.15    | 0.71    |              |
| Residuals                                  | 8    | 2764    | 346      |         |         |              |

| T <sup>15</sup> N recovery in 20-40 cm June |      |         |          |         |         | H            |
|---------------------------------------------|------|---------|----------|---------|---------|--------------|
|                                             | D.f. | Sum Sq. | Mean Sq. | F value | p value | significance |
| Fertilizer form                             | 1    | 0.0358  | 0.0358   | 1.12    | 0.32    |              |
| Tillage form                                | 1    | 0.0263  | 0.0263   | 0.82    | 0.39    |              |
| Fertilizer:Tillage                          | 1    | 0.0678  | 0.0678   | 2.12    | 0.18    |              |
| Residuals                                   | 8    | 0.2558  | 0.032    |         |         |              |

| T <sup>15</sup> N recovery in 40-60 cm June |      |         |          |         |         | I            |
|---------------------------------------------|------|---------|----------|---------|---------|--------------|
|                                             | D.f. | Sum Sq. | Mean Sq. | F value | p value | significance |
| Fertilizer form                             | 1    | 0.123   | 0.123    | 2.54    | 0.15    |              |
| Tillage form                                | 1    | 0.047   | 0.047    | 0.97    | 0.35    |              |
| Fertilizer:Tillage                          | 1    | 0.001   | 0.001    | 0.01    | 0.91    |              |

|           |   |       |        |
|-----------|---|-------|--------|
| Residuals | 8 | 0.388 | 0.0485 |
|-----------|---|-------|--------|

| NO <sub>3</sub> - <sup>15</sup> N recovery June |      |         |          |         |         | J            |
|-------------------------------------------------|------|---------|----------|---------|---------|--------------|
|                                                 | D.f. | Sum Sq. | Mean Sq. | F value | p value | significance |
| Fertilizer form                                 | 1    | 1       | 1        | 0.01    | 0.92    |              |
| Tillage form                                    | 1    | 81      | 81       | 0.59    | 0.47    |              |
| Fertilizer:Tillage                              | 1    | 103     | 103      | 0.75    | 0.41    |              |
| Residuals                                       | 8    | 1100    | 137      |         |         |              |

| MB <sup>15</sup> N recovery June |      |         |          |         |         | K            |
|----------------------------------|------|---------|----------|---------|---------|--------------|
|                                  | D.f. | Sum Sq. | Mean Sq. | F value | p value | significance |
| Fertilizer form                  | 1    | 2.9     | 2.9      | 0.27    | 0.62    |              |
| Tillage form                     | 1    | 3       | 3        | 0.28    | 0.61    |              |
| Fertilizer:Tillage               | 1    | 3.6     | 3.6      | 0.33    | 0.58    |              |
| Residuals                        | 8    | 85.6    | 10.7     |         |         |              |

| Soil <sup>15</sup> N recovery July |      |         |          |         |         | L            |
|------------------------------------|------|---------|----------|---------|---------|--------------|
|                                    | D.f. | Sum Sq. | Mean Sq. | F value | p value | significance |
| Fertilizer form                    | 1    | 0.0051  | 0.0051   | 0.24    | 0.638   |              |
| Tillage form                       | 1    | 0.1572  | 0.1572   | 7.33    | 0.027   | *            |
| Fertilizer:Tillage                 | 1    | 0.1358  | 0.1358   | 6.33    | 0.036   | *            |
| Residuals                          | 8    | 0.1715  | 0.0214   |         |         |              |

Signif. codes: 0 '\*\*\*' 0.001 '\*\*' 0.01 '\*' 0.05 '.' 0.1 ' ' 1  
log10-transformed

| Comparison            | Difference | lwr     | upr    | p adj  |
|-----------------------|------------|---------|--------|--------|
| NT:Liquid - MT:Liquid | 0.44171    | 0.05887 | 0.8246 | 0.0252 |
| NT - MT               | 0.2289     | 0.03401 | 0.4239 | 0.0267 |

| T <sup>15</sup> N recovery in 0-20 cm July |      |         |          |         |         | M            |
|--------------------------------------------|------|---------|----------|---------|---------|--------------|
|                                            | D.f. | Sum Sq. | Mean Sq. | F value | p value | significance |
| Fertilizer form                            | 1    | 27      | 27       | 0.43    | 0.5314  |              |
| Tillage form                               | 1    | 798     | 798      | 12.79   | 0.0072  | **           |
| Fertilizer:Tillage                         | 1    | 570     | 570      | 9.13    | 0.0165  | *            |
| Residuals                                  | 8    | 499     | 62       |         |         |              |

Signif. codes: 0 '\*\*\*' 0.001 '\*\*' 0.01 '\*' 0.05 '.' 0.1 ' ' 1  
log10-transformed

| Comparison            | Difference | lwr   | upr    | p adj  |
|-----------------------|------------|-------|--------|--------|
| No-till - Mini-till   | 16.31      | 5.793 | 26.83  | 0.0072 |
| NT:Liquid - MT:Liquid | 30.09      | 9.435 | 50.752 | 0.007  |

| T <sup>15</sup> N recovery in 20-40 cm July |      |         |          |         |         | N            |
|---------------------------------------------|------|---------|----------|---------|---------|--------------|
|                                             | D.f. | Sum Sq. | Mean Sq. | F value | p value | significance |
| Fertilizer form                             | 1    | 0.128   | 0.128    | 2.47    | 0.15    |              |
| Tillage form                                | 1    | 0.002   | 0.002    | 0.04    | 0.85    |              |
| Fertilizer:Tillage                          | 1    | 0.065   | 0.065    | 1.27    | 0.29    |              |
| Residuals                                   | 8    | 0.0517  | 0.0517   |         |         |              |

log10-transformed

| T <sup>15</sup> N recovery in 40-60 cm July |      |         |          |         |         | O            |
|---------------------------------------------|------|---------|----------|---------|---------|--------------|
|                                             | D.f. | Sum Sq. | Mean Sq. | F value | p value | significance |
| Fertilizer form                             | 1    | 0.0718  | 0.0718   | 3.09    | 0.12    |              |
| Tillage form                                | 1    | 0.0131  | 0.0131   | 0.56    | 0.47    |              |
| Fertilizer:Tillage                          | 1    | 0.0008  | 0.0008   | 0.03    | 0.86    |              |
| Residuals                                   | 8    | 0.1861  | 0.0233   |         |         |              |

log10-transformed

| NO <sub>3</sub> - <sup>15</sup> N recovery July |      |         |          |         |         | P            |
|-------------------------------------------------|------|---------|----------|---------|---------|--------------|
|                                                 | D.f. | Sum Sq. | Mean Sq. | F value | p value | significance |
| Fertilizer form                                 | 1    | 10.9    | 10.9     | 4.37    | 0.07    | .            |
| Tillage form                                    | 1    | 21      | 21       | 8.44    | 0.02    | *            |
| Fertilizer:Tillage                              | 1    | 18      | 18       | 7.23    | 0.028   | *            |
| Residuals                                       | 8    | 19.9    | 2.49     |         |         |              |

Signif. codes: 0 '\*\*\*' 0.001 '\*\*' 0.01 '\*' 0.05 '.' 0.1 ' ' 1

log10-transformed

| Comparison              | Difference | lwr     | upr     | p adj  |
|-------------------------|------------|---------|---------|--------|
| No-till - Mini-till     | 2.647      | 0.5453  | 4.749   | 0.0198 |
| NT:Liquid - MT:Liquid   | 5.0986     | 0.9709  | 9.2263  | 0.0177 |
| NT:Liquid - MT:Granular | 4.5532     | 0.4255  | 8.6809  | 0.0315 |
| NT:granular - NT:Liquid | -4.3576    | -8.4853 | -0.2299 | 0.0389 |

| MB <sup>15</sup> N recovery July |      |          |          |         |         | Q            |
|----------------------------------|------|----------|----------|---------|---------|--------------|
|                                  | D.f. | Sum Sq.  | Mean Sq. | F value | p value | significance |
| Fertilizer form                  | 1    | 0.03     | 0.03     | 0.07    | 0.8     |              |
| Tillage form                     | 1    | 3.20E-01 | 3.20E-01 | 0.74    | 0.42    |              |
| Fertilizer:Tillage               | 1    | 1.89E+00 | 1.89E+00 | 4.35    | 0.07    | .            |
| Residuals                        | 8    | 3.48E+00 | 4.35E-01 |         |         |              |

Signif. codes: 0 '\*\*\*' 0.001 '\*\*' 0.01 '\*' 0.05 '.' 0.1 ' ' 1

| Plant <sup>15</sup> N recovery July |      |         |          |         |         | R            |
|-------------------------------------|------|---------|----------|---------|---------|--------------|
|                                     | D.f. | Sum Sq. | Mean Sq. | F value | p value | significance |
| Fertilizer form                     | 1    | 18      | 18       | 0.16    | 0.7     |              |
| Tillage form                        | 1    | 1       | 1        | 0.01    | 0.91    |              |
| Fertilizer:Tillage                  | 1    | 47      | 47       | 0.43    | 0.53    |              |
| Residuals                           | 8    | 873     | 109.1    |         |         |              |

| Leave <sup>15</sup> N recovery July |      |         |          |         |         | S            |
|-------------------------------------|------|---------|----------|---------|---------|--------------|
|                                     | D.f. | Sum Sq. | Mean Sq. | F value | p value | significance |
| Fertilizer form                     | 1    | 0       | 0        | 0       | 0.99    |              |
| Tillage form                        | 1    | 5       | 5        | 0.08    | 0.78    |              |
| Fertilizer:Tillage                  | 1    | 42      | 42       | 0.74    | 0.41    |              |
| Residuals                           | 8    | 456     | 57       |         |         |              |

| Shoot <sup>15</sup> N recovery July |      |         |          |         |         | T            |
|-------------------------------------|------|---------|----------|---------|---------|--------------|
|                                     | D.f. | Sum Sq. | Mean Sq. | F value | p value | significance |
| Fertilizer form                     | 1    | 16.5    | 16.5     | 1.6     | 0.24    |              |
| Tillage form                        | 1    | 11.4    | 11.4     | 1.1     | 0.32    |              |
| Fertilizer:Tillage                  | 1    | 0.1     | 0.1      | 0.01    | 0.91    |              |
| Residuals                           | 8    | 82.7    | 10.34    |         |         |              |

| Competition index <sup>15</sup> N July |      |          |          |         |         | U            |
|----------------------------------------|------|----------|----------|---------|---------|--------------|
|                                        | D.f. | Sum Sq.  | Mean Sq. | F value | p value | significance |
| Fertilizer form                        | 1    | 0.000009 | 0.000009 | 0.03    | 0.86    |              |
| Tillage form                           | 1    | 0.000119 | 0.000119 | 0.43    | 0.53    |              |
| Fertilizer:Tillage                     | 1    | 0.000833 | 0.000833 | 3       | 0.12    |              |
| Residuals                              | 8    | 0.00222  | 0.000278 |         |         |              |

| Competition index N July |      |         |          |         |         | V            |
|--------------------------|------|---------|----------|---------|---------|--------------|
|                          | D.f. | Sum Sq. | Mean Sq. | F value | p value | significance |
| Fertilizer form          | 1    | 0.636   | 0.636    | 4.97    | 0.056   | .            |
| Tillage form             | 1    | 0.126   | 0.126    | 0.99    | 0.35    |              |
| Fertilizer:Tillage       | 1    | 0.217   | 0.217    | 1.7     | 0.229   |              |
| Residuals                | 8    | 1.023   | 0.128    |         |         |              |

Signif. codes: 0 '\*\*\*' 0.001 '\*\*' 0.01 '\*' 0.05 '.' 0.1 ' ' 1

| Aboveground dry biomass July |      |         |          |         |         | W            |
|------------------------------|------|---------|----------|---------|---------|--------------|
|                              | D.f. | Sum Sq. | Mean Sq. | F value | p value | significance |
| Fertilizer form              | 1    | 0.1     | 0.0095   | 0.12    | 0.74    |              |
| Tillage form                 | 1    | 0.087   | 0.087    | 1.1     | 0.33    |              |
| Fertilizer:Tillage           | 1    | 0.007   | 0.0071   | 0.09    | 0.77    |              |
| Residuals                    | 8    | 0.633   | 0.0792   |         |         |              |

| Plant N yield July |      |         |          |         |         | X            |
|--------------------|------|---------|----------|---------|---------|--------------|
|                    | D.f. | Sum Sq. | Mean Sq. | F value | p value | significance |
| Fertilizer form    | 1    | 58      | 57.8     | 0.59    | 0.47    |              |
| Tillage form       | 1    | 224     | 224.1    | 2.28    | 0.17    |              |
| Fertilizer:Tillage | 1    | 15      | 15.3     | 0.16    | 0.7     |              |
| Residuals          | 8    | 786     | 98.3     |         |         |              |

| NdfF July          |      |         |          |         |         | Y            |
|--------------------|------|---------|----------|---------|---------|--------------|
|                    | D.f. | Sum Sq. | Mean Sq. | F value | p value | significance |
| Fertilizer form    | 1    | 1.7     | 1.74     | 0.31    | 0.59    |              |
| Tillage form       | 1    | 0.1     | 0.14     | 0.03    | 0.88    |              |
| Fertilizer:Tillage | 1    | 4       | 4.01     | 0.71    | 0.42    |              |
| Residuals          | 8    | 45.1    | 5.64     |         |         |              |

| Soil <sup>15</sup> N recovery August |      |         |          |         |         | Z            |
|--------------------------------------|------|---------|----------|---------|---------|--------------|
|                                      | D.f. | Sum Sq. | Mean Sq. | F value | p value | significance |
| Fertilizer form                      | 1    | 115.8   | 115.8    | 3.47    | 0.1     | .            |
| Tillage form                         | 1    | 76.6    | 76.6     | 2.3     | 0.17    |              |
| Fertilizer:Tillage                   | 1    | 37.7    | 37.7     | 1.13    | 0.32    |              |
| Residuals                            | 8    | 267.1   | 33.4     |         |         |              |

| T <sup>15</sup> N recovery in 0-20 cm August |      |         |          |         |         | AA           |
|----------------------------------------------|------|---------|----------|---------|---------|--------------|
|                                              | D.f. | Sum Sq. | Mean Sq. | F value | p value | significance |
| Fertilizer form                              | 1    | 193.2   | 193.2    | 5.58    | 0.046   | *            |
| Tillage form                                 | 1    | 6.4     | 6.4      | 0.19    | 0.678   |              |
| Fertilizer:Tillage                           | 1    | 35.6    | 35.6     | 1.03    | 0.34    |              |
| Residuals                                    | 8    | 276.8   | 34.6     |         |         |              |

| Comparison        | Difference | lwr    | upr     | p adj  |
|-------------------|------------|--------|---------|--------|
| Granular - Liquid | -8.025     | -15.86 | -0.1939 | 0.0457 |

| T <sup>15</sup> N recovery in 20-40 cm August |      |         |          |         |         | AB           |
|-----------------------------------------------|------|---------|----------|---------|---------|--------------|
|                                               | D.f. | Sum Sq. | Mean Sq. | F value | p value | significance |
| Fertilizer form                               | 1    | 2.76    | 2.76     | 1.83    | 0.213   |              |
| Tillage form                                  | 1    | 5.45    | 5.45     | 3.62    | 0.094   | .            |
| Fertilizer:Tillage                            | 1    | 5.54    | 5.54     | 3.68    | 0.091   | .            |
| Residuals                                     | 8    | 12.04   | 1.51     |         |         |              |

Signif. codes: 0 '\*\*\*' 0.001 '\*\*' 0.01 '\*' 0.05 '.' 0.1 ' ' 1

| T <sup>15</sup> N recovery in 40-60 cm August                 |      |         |          |         |         | AC           |
|---------------------------------------------------------------|------|---------|----------|---------|---------|--------------|
|                                                               | D.f. | Sum Sq. | Mean Sq. | F value | p value | significance |
| Fertilizer form                                               | 1    | 1.05    | 1.05     | 1.68    | 0.23    |              |
| Tillage form                                                  | 1    | 5.6     | 5.6      | 9.01    | 0.17    | *            |
| Fertilizer:Tillage                                            | 1    | 1.17    | 1.17     | 1.88    | 0.208   |              |
| Residuals                                                     | 8    | 4.97    | 0.62     |         |         |              |
| Signif. codes: 0 '***' 0.001 '**' 0.01 '*' 0.05 '.' 0.1 ' ' 1 |      |         |          |         |         |              |

| Comparison          | Difference | lwr    | upr   | p adj |
|---------------------|------------|--------|-------|-------|
| No-till - Mini-till | 1.366      | 0.3167 | 2.415 | 0.017 |

| NO <sub>3</sub> - <sup>15</sup> N recovery August |      |         |          |         |         | AD           |
|---------------------------------------------------|------|---------|----------|---------|---------|--------------|
|                                                   | D.f. | Sum Sq. | Mean Sq. | F value | p value | significance |
| Fertilizer form                                   | 1    | 1.1     | 1.1      | 0.26    | 0.62    |              |
| Tillage form                                      | 1    | 0.4     | 0.4      | 0.1     | 0.76    |              |
| Fertilizer:Tillage                                | 1    | 7.5     | 7.5      | 1.8     | 0.22    |              |
| Residuals                                         | 8    | 33.4    | 4.18     |         |         |              |

| MB <sup>15</sup> N recovery August                            |      |          |          |         |         | AE           |
|---------------------------------------------------------------|------|----------|----------|---------|---------|--------------|
|                                                               | D.f. | Sum Sq.  | Mean Sq. | F value | p value | significance |
| Fertilizer form                                               | 1    | 3.42E-01 | 3.42E-01 | 2.29    | 0.168   |              |
| Tillage form                                                  | 1    | 7.43E-01 | 7.43E-01 | 4.98    | 0.056   | .            |
| Fertilizer:Tillage                                            | 1    | 2.68E-01 | 2.68E-01 | 1.8     | 0.217   |              |
| Residuals                                                     | 8    | 1.19E+00 | 1.49E-01 |         |         |              |
| Signif. codes: 0 '***' 0.001 '**' 0.01 '*' 0.05 '.' 0.1 ' ' 1 |      |          |          |         |         |              |

| Plant <sup>15</sup> N recovery August                         |      |         |          |         |         | AF           |
|---------------------------------------------------------------|------|---------|----------|---------|---------|--------------|
|                                                               | D.f. | Sum Sq. | Mean Sq. | F value | p value | significance |
| Fertilizer form                                               | 1    | 848     | 848      | 18.97   | 0.0024  | **           |
| Tillage form                                                  | 1    | 319     | 319      | 7.15    | 0.0282  | *            |
| Fertilizer:Tillage                                            | 1    | 49      | 49       | 1.1     | 0.324   |              |
| Residuals                                                     | 8    | 357     | 45       |         |         |              |
| Signif. codes: 0 '***' 0.001 '**' 0.01 '*' 0.05 '.' 0.1 ' ' 1 |      |         |          |         |         |              |

| Comparison                | Difference | lwr    | upr    | p adj  |
|---------------------------|------------|--------|--------|--------|
| Granular - Liquid         | -16.81     | -25.71 | -7.909 | 0.0024 |
| No-till - Mini-till       | -10.32     | -19.22 | -1.418 | 0.0282 |
| NT:Granular - MT:Granular | -27.126    | -44.6  | -9.648 | 0.0048 |
| NT:Granular - NT:Liquid   | -20.865    | -38.34 | -3.386 | 0.0212 |

| Grain <sup>15</sup> N recovery August                         |      |         |          |         |         | AG           |
|---------------------------------------------------------------|------|---------|----------|---------|---------|--------------|
|                                                               | D.f. | Sum Sq. | Mean Sq. | F value | p value | significance |
| Fertilizer form                                               | 1    | 493     | 493      | 21.74   | 0.0016  | **           |
| Tillage form                                                  | 1    | 300     | 300      | 13.24   | 0.0066  | **           |
| Fertilizer:Tillage                                            | 1    | 29      | 29       | 1.29    | 0.2887  |              |
| Residuals                                                     | 8    | 181     | 23       |         |         |              |
| Signif. codes: 0 '***' 0.001 '**' 0.01 '*' 0.05 '.' 0.1 ' ' 1 |      |         |          |         |         |              |

| Comparison          | Difference | lwr    | upr    | p adj  |
|---------------------|------------|--------|--------|--------|
| Granular - Liquid   | -12.81     | -19.15 | -6.477 | 0.0016 |
| No-till - Mini-till | -10        | -16.34 | -3.663 | 0.0066 |

| Leave <sup>15</sup> N recovery August |      |         |          |         |         | AH           |
|---------------------------------------|------|---------|----------|---------|---------|--------------|
|                                       | D.f. | Sum Sq. | Mean Sq. | F value | p value | significance |
| Fertilizer form                       | 1    | 19.37   | 19.37    | 5.18    | 0.052   | .            |
| Tillage form                          | 1    | 0.62    | 0.62     | 0.17    | 0.694   |              |

|                                                                  |   |       |      |   |       |
|------------------------------------------------------------------|---|-------|------|---|-------|
| Fertilizer:Tillage                                               | 1 | 0     | 0    | 0 | 0.973 |
| Residuals                                                        | 8 | 29.91 | 3.74 |   |       |
| Signif. codes: 0 '****' 0.001 '***' 0.01 '**' 0.05 '.' 0.1 ' ' 1 |   |       |      |   |       |

| Shoot <sup>15</sup> N recovery August                            |      |         |          |         |         | AI           |
|------------------------------------------------------------------|------|---------|----------|---------|---------|--------------|
|                                                                  | D.f. | Sum Sq. | Mean Sq. | F value | p value | significance |
| Fertilizer form                                                  | 1    | 6.33    | 6.33     | 3.76    | 0.088   | .            |
| Tillage form                                                     | 1    | 0.06    | 0.06     | 0.03    | 0.857   |              |
| Fertilizer:Tillage                                               | 1    | 2.84    | 2.84     | 1.68    | 0.23    |              |
| Residuals                                                        | 8    | 13.47   | 1.68E+00 |         |         |              |
| Signif. codes: 0 '****' 0.001 '***' 0.01 '**' 0.05 '.' 0.1 ' ' 1 |      |         |          |         |         |              |

| Competition index <sup>15</sup> N August |      |          |          |         |         | AJ           |
|------------------------------------------|------|----------|----------|---------|---------|--------------|
|                                          | D.f. | Sum Sq.  | Mean Sq. | F value | p value | significance |
| Fertilizer form                          | 1    | 2.40E-06 | 2.40E-06 | 0.16    | 0.6971  |              |
| Tillage form                             | 1    | 2.88E-04 | 2.88E-04 | 19.37   | 0.0023  | **           |
| Fertilizer:Tillage                       | 1    | 3.00E-07 | 3.00E-07 | 0.02    | 0.8953  |              |
| Residuals                                | 8    | 1.19E-04 | 1.49E-05 |         |         |              |

| Comparison            | Difference | lwr      | upr     | p adj  |
|-----------------------|------------|----------|---------|--------|
| No-till - Mini-till   | 0.009791   | 0.00466  | 0.01492 | 0.0023 |
| NT:Liquid - MT:Liquid | 0.0100932  | 1.71E-05 | 0.02017 | 0.0496 |

| Competition index N August |      |         |          |         |         | AK           |
|----------------------------|------|---------|----------|---------|---------|--------------|
|                            | D.f. | Sum Sq. | Mean Sq. | F value | p value | significance |
| Fertilizer form            | 1    | 0.305   | 0.305    | 2.32    | 0.17    |              |
| Tillage form               | 1    | 0.043   | 0.043    | 0.32    | 0.59    |              |
| Fertilizer:Tillage         | 1    | 0.044   | 0.044    | 0.33    | 0.58    |              |
| Residuals                  | 8    | 1.053   | 0.1316   |         |         |              |

| NHI August         |      |         |          |         |         | AL           |
|--------------------|------|---------|----------|---------|---------|--------------|
|                    | D.f. | Sum Sq. | Mean Sq. | F value | p value | significance |
| Fertilizer form    | 1    | 0.00052 | 0.000519 | 0.6     | 0.46    |              |
| Tillage form       | 1    | 0.00244 | 0.002444 | 2.84    | 0.13    |              |
| Fertilizer:Tillage | 1    | 0.00013 | 0.000126 | 0.15    | 0.71    |              |
| Residuals          | 8    | 0.00688 | 0.00086  |         |         |              |

| Ndff August                                                   | AM   |         |          |         |         |              |
|---------------------------------------------------------------|------|---------|----------|---------|---------|--------------|
|                                                               | D.f. | Sum Sq. | Mean Sq. | F value | p value | significance |
| Fertilizer form                                               | 1    | 38.8    | 38.8     | 16.68   | 0.0035  | **           |
| Tillage form                                                  | 1    | 13.8    | 13.8     | 5.93    | 0.0409  | *            |
| Fertilizer:Tillage                                            | 1    | 2.4     | 2.4      | 1.02    | 0.3426  |              |
| Residuals                                                     | 8    | 18.6    | 2.3      |         |         |              |
| Signif. codes: 0 '***' 0.001 '**' 0.01 '*' 0.05 '.' 0.1 ' ' 1 |      |         |          |         |         |              |

| Comparison          | Difference | lwr    | upr     | p adj  |
|---------------------|------------|--------|---------|--------|
| Granular - Liquid   | -3.595     | -5.625 | -1.565  | 0.0035 |
| No-till - Mini-till | -2.143     | -4.173 | -0.1131 | 0.0409 |

| NO <sub>3</sub> -N June |      |          |          |         | AN      |              |
|-------------------------|------|----------|----------|---------|---------|--------------|
|                         | D.f. | Sum Sq.  | Mean Sq. | F value | p value | significance |
| Fertilizer form         | 1    | 9.33E+01 | 9.33E+01 | 5.17    | 0.053   | .            |

|                    |   |          |          |      |       |
|--------------------|---|----------|----------|------|-------|
| Tillage form       | 1 | 7.80E+00 | 7.80E+00 | 0.43 | 0.529 |
| Fertilizer:Tillage | 1 | 1.29E+01 | 1.29E+01 | 0.72 | 0.442 |
| Residuals          | 8 | 1.44E+02 | 1.80E+01 |      |       |

log10-transformed

| NO <sub>3</sub> -N July |      |          |          |         |         | AO           |
|-------------------------|------|----------|----------|---------|---------|--------------|
|                         | D.f. | Sum Sq.  | Mean Sq. | F value | p value | significance |
| Fertilizer form         | 1    | 4.30E-03 | 4.30E-03 | 0.45    | 0.521   |              |
| Tillage form            | 1    | 1.68E-01 | 1.68E-01 | 17.55   | 0.003   | **           |
| Fertilizer:Tillage      | 1    | 3.91E-02 | 3.91E-02 | 7.21    | 0.028   | *            |
| Residuals               | 8    | 7.67E-02 | 9.60E-03 |         |         |              |

| Comparison              | Difference | lwr      | upr     | p adj  |
|-------------------------|------------|----------|---------|--------|
| No-till - Mini-till     | 0.2369     | 0.1065   | 0.3673  | 0.003  |
| NT:Liquid - MT:Liquid   | 0.3887     | 1.36E-01 | 0.64478 | 0.0055 |
| NT:Liquid - MT:Granular | 0.27482    | 1.87E-02 | 0.53091 | 0.036  |

| NO <sub>3</sub> -N August |      |          |          |         |          | AP           |
|---------------------------|------|----------|----------|---------|----------|--------------|
|                           | D.f. | Sum Sq.  | Mean Sq. | F value | p value  | significance |
| Fertilizer form           | 1    | 4.80E+00 | 4.80E+00 | 9       | 0.0171   | *            |
| Tillage form              | 1    | 4.83E+01 | 4.83E+01 | 90      | 1.30E-05 | ***          |
| Fertilizer:Tillage        | 1    | 1.22E+01 | 1.22E+01 | 22.7    | 0.0014   | **           |
| Residuals                 | 8    | 4.30E+00 | 5.00E-01 |         |          |              |

| Comparison                | Difference | lwr      | upr      | p adj  |
|---------------------------|------------|----------|----------|--------|
| Granular-Liquid           | 1.268      | 0.293    | 2.242    | 0.0171 |
| No-till - Mini-till       | -4.011     | -4.985   | -3.036   | 0      |
| MT:Granular - MT:Liquid   | 3.2831     | 1.37E+00 | 5.1973   | 0.0026 |
| NT:Liquid - MT:Liquid     | -1.9952    | -3.909   | -0.08104 | 0.0413 |
| NT:Granular - MT:Liquid   | -2.743     | -4.657   | -0.82877 | 0.0077 |
| NT:Liquid - MT:Granular   | -5.2783    | -7.193   | -3.36416 | 0.0001 |
| NT:Granular - MT:Granular | -6.0261    | -7.94    | -4.11189 | 0      |

| C/N grain - August |      |          |          |         |         | AQ           |
|--------------------|------|----------|----------|---------|---------|--------------|
|                    | D.f. | Sum Sq.  | Mean Sq. | F value | p value | significance |
| Fertilizer form    | 1    | 2.52E+00 | 2.52E+00 | 0.96    | 0.35    |              |
| Tillage form       | 1    | 6.06E+00 | 6.06E+00 | 2.32    | 0.17    |              |
| Fertilizer:Tillage | 1    | 3.10E-01 | 3.10E-01 | 0.12    | 0.74    |              |
| Residuals          | 8    | 2.09E+01 | 2.61E+00 |         |         |              |

| C/N leaf - August  | AR   |          |          |         |         |              |
|--------------------|------|----------|----------|---------|---------|--------------|
|                    | D.f. | Sum Sq.  | Mean Sq. | F value | p value | significance |
| Fertilizer form    | 1    | 4.90E+01 | 4.90E+01 | 1.15    | 0.31    |              |
| Tillage form       | 1    | 9.50E+01 | 9.50E+01 | 2.22    | 0.17    |              |
| Fertilizer:Tillage | 1    | 2.00E+00 | 2.00E+00 | 0.05    | 0.83    |              |
| Residuals          | 8    | 3.44E+02 | 4.30E+01 |         |         |              |

| C/N shoot - August |      |          |          |         |         | AS           |
|--------------------|------|----------|----------|---------|---------|--------------|
|                    | D.f. | Sum Sq.  | Mean Sq. | F value | p value | significance |
| Fertilizer form    | 1    | 5.00E+01 | 5.00E+01 | 0.14    | 0.713   |              |
| Tillage form       | 1    | 2.76E+03 | 2.76E+03 | 7.91    | 0.023   | *            |
| Fertilizer:Tillage | 1    | 1.81E+02 | 1.81E+02 | 0.52    | 0.492   |              |
| Residuals          | 8    | 2.79E+03 | 3.48E+02 |         |         |              |

| Comparison          | Difference | lwr    | upr    | p adj  |
|---------------------|------------|--------|--------|--------|
| No-till - Mini-till | -30.3      | -55.15 | -5.452 | 0.0228 |

| Leaf N July        |      |         |          |         |         | AT           |
|--------------------|------|---------|----------|---------|---------|--------------|
|                    | D.f. | Sum Sq. | Mean Sq. | F value | p value | significance |
| Fertilizer form    | 1    | 0.69    | 0.69     | 1.3     | 0.29    |              |
| Tillage form       | 1    | 0.52    | 0.52     | 0.97    | 0.35    |              |
| Fertilizer:Tillage | 1    | 0.16    | 0.16     | 0.3     | 0.6     |              |
| Residuals          | 8    | 4.23    | 0.529    |         |         |              |

| Shoot N July       |      |         |          |         |         | AU           |
|--------------------|------|---------|----------|---------|---------|--------------|
|                    | D.f. | Sum Sq. | Mean Sq. | F value | p value | significance |
| Fertilizer form    | 1    | 0.002   | 0.002    | 0.01    | 0.906   |              |
| Tillage form       | 1    | 0.539   | 0.539    | 5.25    | 0.051   | .            |
| Fertilizer:Tillage | 1    | 0.058   | 0.058    | 0.57    | 0.473   |              |
| Residuals          | 8    | 0.822   | 0.103    |         |         |              |

| Leaf N August      |      |         |          |         |         | AV           |
|--------------------|------|---------|----------|---------|---------|--------------|
|                    | D.f. | Sum Sq. | Mean Sq. | F value | p value | significance |
| Fertilizer form    | 1    | 0.069   | 0.069    | 0.54    | 0.48    |              |
| Tillage form       | 1    | 0.019   | 0.019    | 0.15    | 0.71    |              |
| Fertilizer:Tillage | 1    | 0.001   | 0.001    | 0.01    | 0.92    |              |
| Residuals          | 8    | 1.022   | 0.1278   |         |         |              |

| Shoot N August     |      |         |          |         |         | AW           |
|--------------------|------|---------|----------|---------|---------|--------------|
|                    | D.f. | Sum Sq. | Mean Sq. | F value | p value | significance |
| Fertilizer form    | 1    | 0.086   | 0.086    | 0.77    | 0.41    |              |
| Tillage form       | 1    | 0.009   | 0.009    | 0.08    | 0.79    |              |
| Fertilizer:Tillage | 1    | 0.129   | 0.129    | 1.15    | 0.32    |              |
| Residuals          | 8    | 0.899   | 0.1123   |         |         |              |

| Grain N August     |      |         |          |         |         | AX           |
|--------------------|------|---------|----------|---------|---------|--------------|
|                    | D.f. | Sum Sq. | Mean Sq. | F value | p value | significance |
| Fertilizer form    | 1    | 7.12    | 7.12     | 1.85    | 0.21    |              |
| Tillage form       | 1    | 3.66    | 3.66     | 0.95    | 0.36    |              |
| Fertilizer:Tillage | 1    | 2.38    | 2.38     | 0.62    | 0.45    |              |
| Residuals          | 8    | 30.78   | 3.85     |         |         |              |

| MBN May            |      |         |          |         |         | AY           |
|--------------------|------|---------|----------|---------|---------|--------------|
|                    | D.f. | Sum Sq. | Mean Sq. | F value | p value | significance |
| Fertilizer form    | 1    | 1       | 1        | 0.02    | 0.9     |              |
| Tillage form       | 1    | 5       | 5        | 0.1     | 0.76    |              |
| Fertilizer:Tillage | 1    | 10      | 10       | 0.21    | 0.66    |              |
| Residuals          | 8    | 392     | 48.9     |         |         |              |

| NO <sub>3</sub> -N May |      |         |          |         |         | AZ           |
|------------------------|------|---------|----------|---------|---------|--------------|
|                        | D.f. | Sum Sq. | Mean Sq. | F value | p value | significance |
| Fertilizer form        | 1    | 0.032   | 0.032    | 1.92    | 0.2     |              |
| Tillage form           | 1    | 0.0157  | 0.0157   | 0.94    | 0.36    |              |
| Fertilizer:Tillage     | 1    | 0.0236  | 0.0236   | 1.41    | 0.27    |              |
| Residuals              | 8    | 0.1334  | 0.0167   |         |         |              |

log10-transformed
